# Supplementary material for: High surface area zincosilicates as efficient catalysts for the synthesis of ethyl lactate: an in-depth structural investigation
Source: Royal Society of Chemistry journal article supplement (doi:10.1039/c5cp03577e), 2015-01-01
Supplement: c5cp03577e1.pdf [file c5cp03577e1.pdf]

## Supplementary Information

### High surface area zincosilicates as efficient catalysts for the synthesis of ethyl lactate: an in-depth structural investigation

Xavier Collard,<sup>a</sup> Pierre Louette,<sup>b</sup> Sonia Fiorilli<sup>c</sup> and Carmela Aprile<sup>a,\*</sup>

<sup>a</sup>Unit of Nanomaterial Chemistry (CNano), Department of Chemistry, University of Namur (UNAMUR), Rue de Bruxelles 61, 5000 Namur, Belgium.

<sup>b</sup>Department of Physics, University of Namur (UNAMUR), Rue de Bruxelles 61, 5000 Namur, Belgium.

<sup>c</sup>Department of Applied Science and Technology, Politecnico di Torino, Institute of Chemistry, Corso Duca degli Abruzzi, 24, 10129 Torino, Italy.

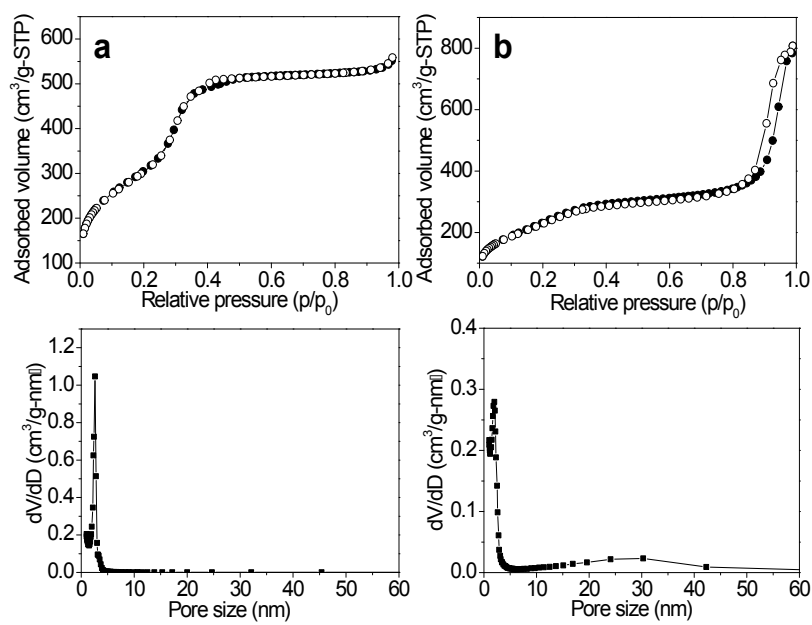

**Fig. S1.** Nitrogen adsorption-desorption isotherms (top) and pore size distribution (bottom) of XS-Zn-MCM-41-C (a) and XS-Zn-MCM-D (b).

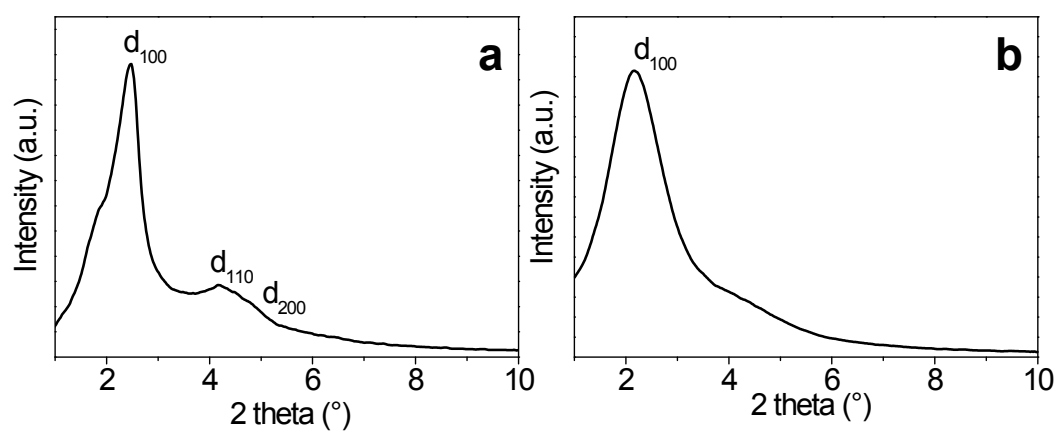

**Fig. S2.** X-ray diffraction pattern of XS-Zn-MCM-41-C (a) and -D (b) in the small angle range ( $2\theta = 1-10^\circ$ ).

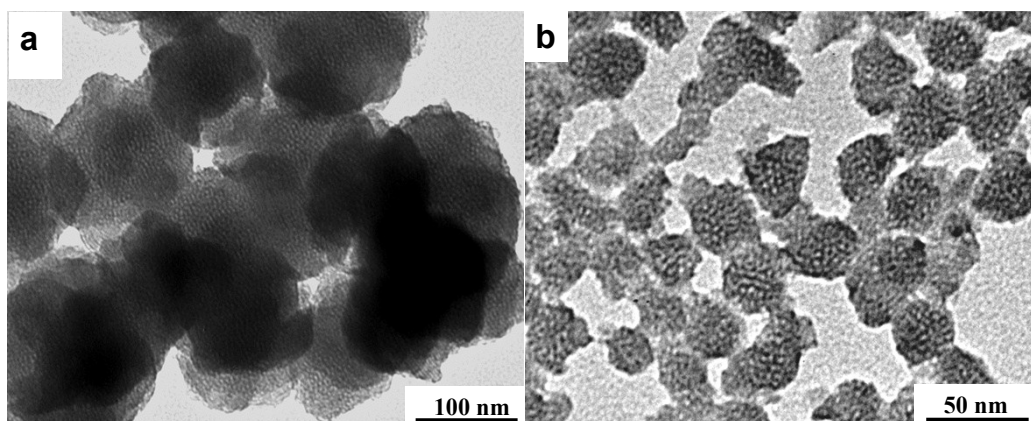

**Fig. S3.** TEM pictures of XS-Zn-MCM-41-C (a) and XS-Zn-MCM-41-D (b).

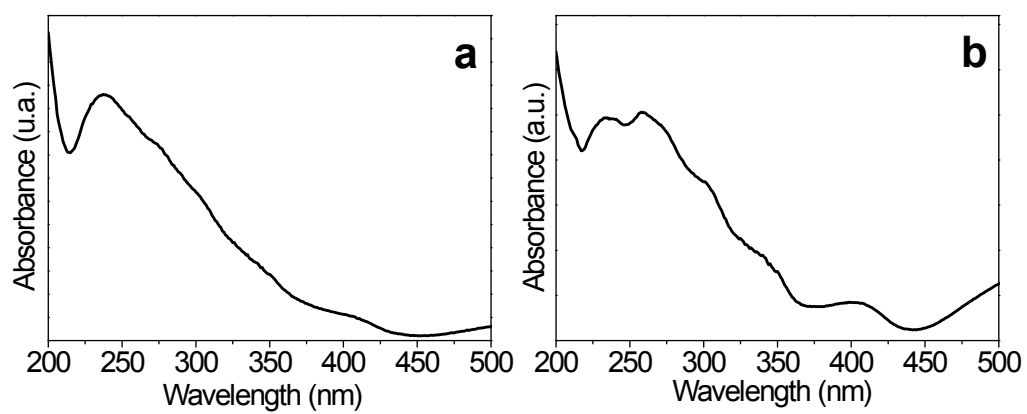

**Fig. S4.** Diffuse reflectance UV-Vis spectra of XS-Zn-MCM-41-C (a) and XS-Zn-MCM-41-D (b).

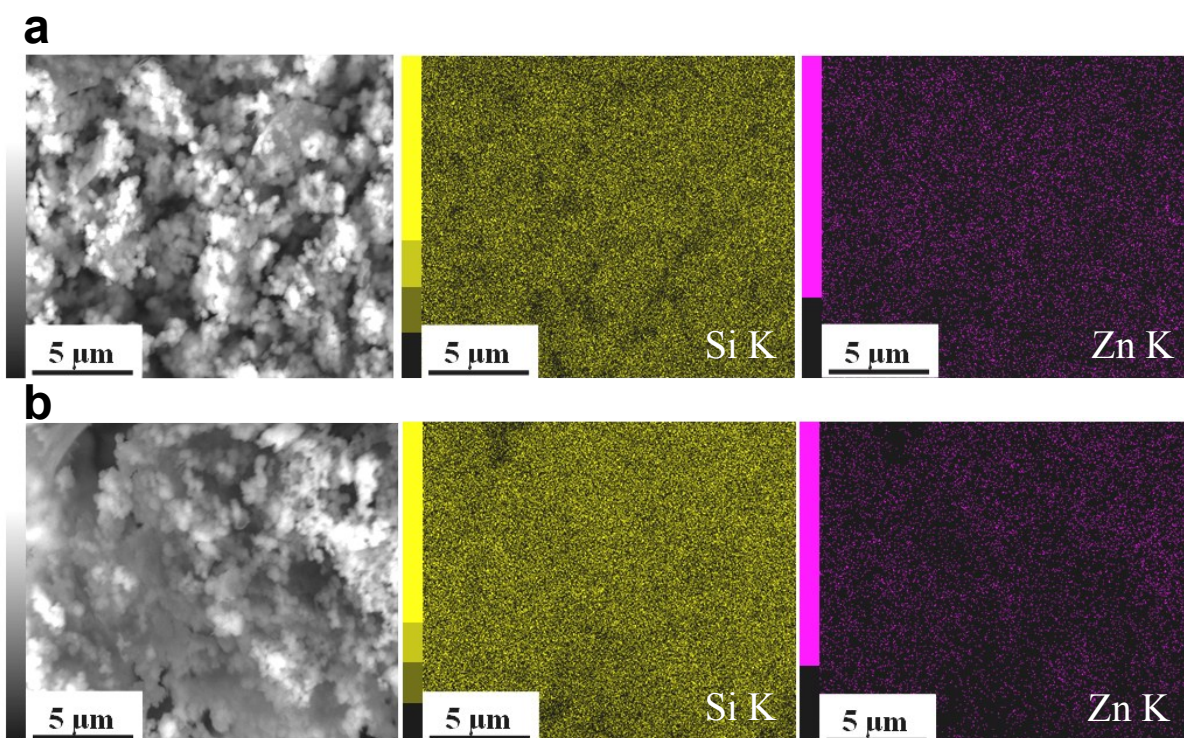

**Fig. S5.** Energy dispersive X-ray spectroscopy mapping of XS-Zn-MCM-41-A (a) and -B (b).

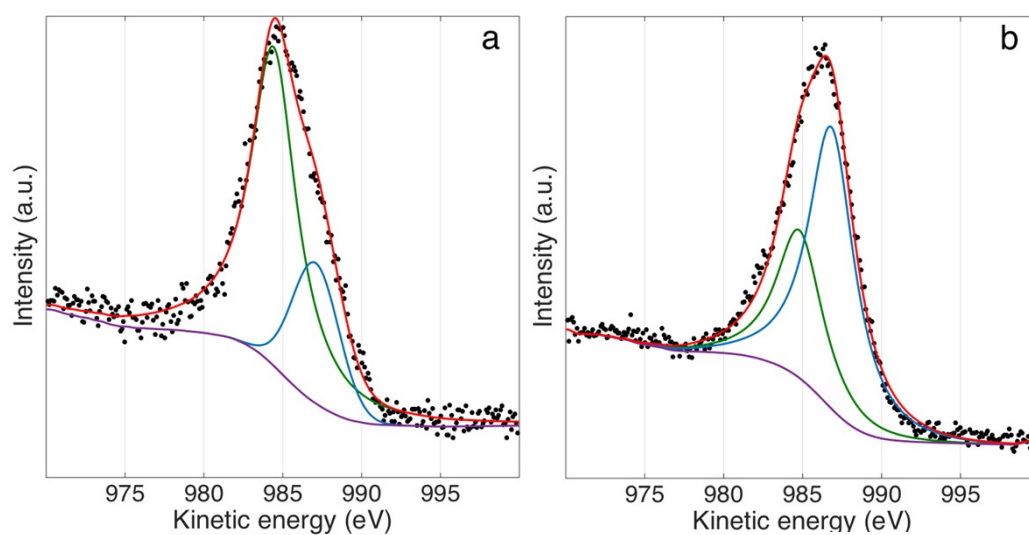

**Fig. S6.** Auger electron spectroscopy of Zn ( $L_3M_{45}M_{45}$ ) spectra of XS-Zn-MCM-41-C (a) and -D (b).

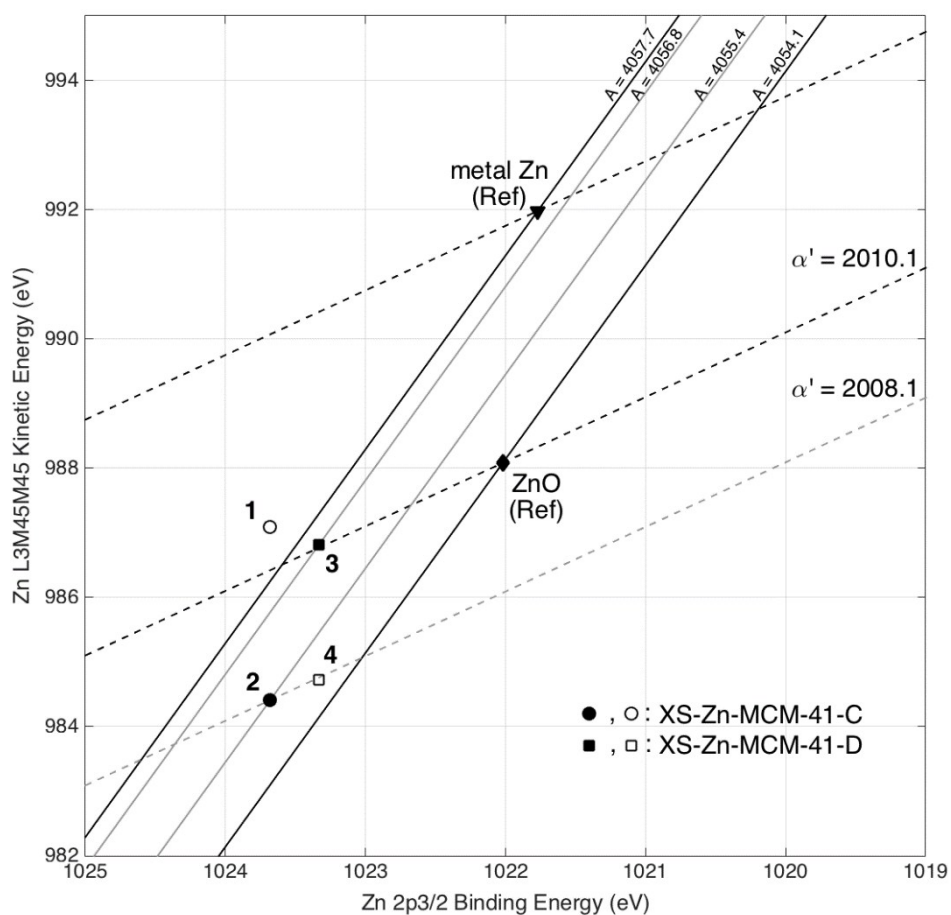

**Fig. S7.** Wagner plot (Zn  $L_3M_{45}M_{45}$  Auger vs. XPS  $Zn2p_{3/2}$ ) of XS-Zn-MCM-41-C and -D. Filled circle/square represents the most intense component and empty circle/square the smallest one.

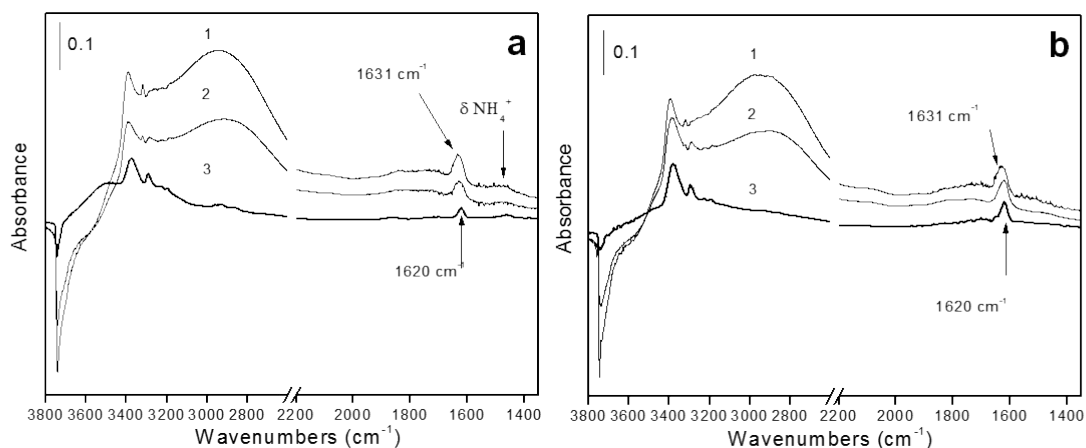

**Fig. S8.** IR difference spectra concerning  $NH_3$  adsorption at r.t. on XS-Zn-MCM-41-C (a) and on XS-Zn-MCM-41-D (b) outgassed 673 K. Curve 1-2 are related to spectra obtained, respectively, under *ca.* 20 mbar and *ca.* 5 mbar  $NH_3$  equilibrium pressures. Curve 3: prolonged outgassing at RT after ammonia dosages. Spectra show breaks in the 2500-2000  $cm^{-1}$  range.
